# Supplementary material for: Evidence for a multivalent effect in inhibition of sulfatases involved in lysosomal storage disorders (LSDs)
Source: Royal Society of Chemistry journal article supplement (doi:10.1039/c6ra15806d), 2016-01-01

# Evidence for a Multivalent Effect in Inhibition of Sulfatases Involved in Lysosomal Storage Disorders (LSDs)

**G. D'Adamio,<sup>a</sup> C. Matassini,<sup>\*a</sup> C. Parmeggiani,<sup>a,b</sup> S. Catarzi,<sup>c</sup> A. Morrone,<sup>c</sup> A. Goti,<sup>c</sup> P. Paoli,<sup>d</sup> and F. Cardona<sup>\*a</sup>**

<sup>a</sup>Department of Chemistry "Ugo Schiff", University of Florence, Via della Lastruccia 3-13, 50019 Sesto Fiorentino (FI), Italy.

<sup>b</sup>CNR – INO and LENS, via N. Carrara 1, 50019 Sesto Fiorentino (FI), Italy.

<sup>c</sup>Paediatric Neurology Unit and Laboratories, Neuroscience Department, Meyer Children's Hospital, and Department of Neurosciences, Pharmacology and Child Health. University of Florence, Viale Pieraccini n. 24, 50139 Firenze, Italy.

<sup>d</sup>Department of Experimental and Clinical Biomedical Sciences, University of Florence, Viale Morgagni 50, 50134 Florence, Italy.

## Supporting Information

## Table of contents

---

|                                                                                              |       |
|----------------------------------------------------------------------------------------------|-------|
| Synthesis and characterization of compounds <b>2</b> and <b>4</b> .                          | S3-S4 |
| <sup>1</sup> H-NMR and <sup>13</sup> C-NMR spectra of compound <b>4</b> .                    | S5    |
| Synthesis and characterization of compounds <b>5</b> .                                       | S6    |
| <sup>1</sup> H-NMR and <sup>13</sup> C-NMR spectra of compound <b>5</b> .                    | S7    |
| Synthesis and characterization of compounds <b>6</b> .                                       | S8    |
| <sup>1</sup> H-NMR and <sup>13</sup> C-NMR spectra of compound <b>6</b> .                    | S9    |
| Synthesis and characterization of compounds <b>8</b> .                                       | S10   |
| <sup>1</sup> H-NMR and <sup>13</sup> C-NMR spectra of compound <b>8</b> .                    | S11   |
| Synthesis and characterization of nonavalent pyrrolidine iminosugar <b>10</b> .              | S12   |
| Characterization, <sup>1</sup> H-NMR and <sup>13</sup> C-NMR spectra of compound <b>10</b> . | S13   |
| Synthesis and characterization of compound <b>12</b> .                                       | S14   |
| <sup>1</sup> H-NMR and <sup>13</sup> C-NMR spectra of compound <b>12</b> .                   | S15   |
| Synthesis and characterization of compound <b>13</b> .                                       | S16   |
| <sup>1</sup> H-NMR and <sup>13</sup> C-NMR spectra of compound <b>13</b> .                   | S17   |
| Synthesis and characterization of nonavalent pyrrolidine iminosugar <b>14</b> .              | S18   |
| <sup>1</sup> H-NMR and <sup>13</sup> C-NMR spectra of compound <b>14</b> .                   | S19   |
| Biochemical characterization on human GALNS and IDS.                                         | S20   |
| IC <sub>50</sub> determination.                                                              | S21   |
| IC <sub>50</sub> of compound <b>10</b> towards GALNS.                                        | S23   |
| IC <sub>50</sub> of compound <b>14</b> towards GALNS.                                        | S24   |
| IC <sub>50</sub> of compound <b>6</b> towards GALNS.                                         | S25   |
| IC <sub>50</sub> of compound <b>13</b> towards GALNS.                                        | S26   |
| IC <sub>50</sub> of compound <b>10</b> towards IDS.                                          | S27   |
| IC <sub>50</sub> of compound <b>14</b> towards IDS.                                          | S28   |
| IC <sub>50</sub> of compound <b>6</b> towards IDS.                                           | S29   |
| IC <sub>50</sub> of compound <b>13</b> towards IDS.                                          | S30   |

## Synthesis of (2*R*,3*R*,4*R*)-3,4-bis(benzyloxy)-2-[(benzyloxy)methyl]-1-[6-azido]hexyl]-1*H*-pyrrolidine (**4**)

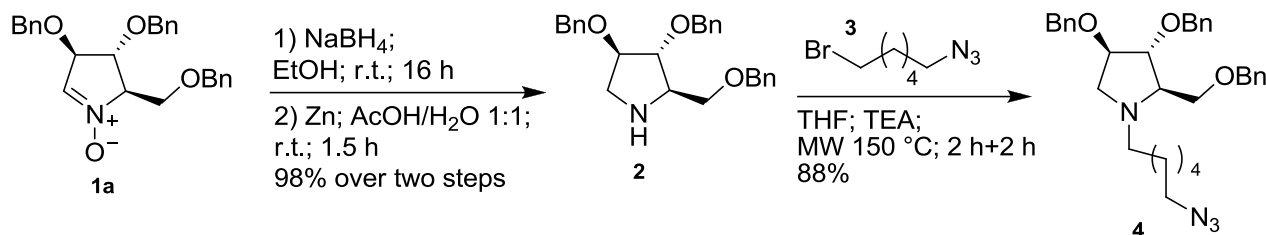

To a solution of **1a** (125 mg, 0.3 mmol) in 6 ml of ethanol, NaBH<sub>4</sub> (23 mg, 0.6 mmol) was added and the mixture was stirred at room temperature for 16 h, until a TLC analysis (AcOEt:EP 1:1) showed the disappearance of the starting material ( $R_f = 0.30$ ) and the formation of a new product ( $R_f = 0.91$ ). After the addition of 0.5 ml of MeOH and 1.5 ml of H<sub>2</sub>O the mixture was raised at room temperature and stirred for another 3 h, then it was evaporated under reduced pressure and the crude obtained filtered through Celite® washing the solid several times with ethyl ether. The collected solution was evaporated under reduced pressure affording the desired pure hydroxylamine intermediate (124 mg, 0.3 mmol) that was dissolved in 4 ml of acetic acid. Zn powder (351 mg, 6 mmol) and 4 ml of H<sub>2</sub>O were added. The reaction mixture was stirred at room temperature for 1.5 h until a TLC analysis (CH<sub>2</sub>Cl<sub>2</sub>:MeOH 30:1) showed the disappearance of the starting material ( $R_f = 0.81$ ) and the formation of a new product ( $R_f = 0.21$ ). After filtration through cotton, the mixture was concentrated at reduced pressure and then saturated aqueous solution of Na<sub>2</sub>CO<sub>3</sub> was added at 0 °C until basic pH. After extraction with AcOEt (3 x 30 mL), the organic layers were dried on Na<sub>2</sub>SO<sub>4</sub>, concentrated under reduced pressure and the crude was purified by Flash Column Chromatography (CH<sub>2</sub>Cl<sub>2</sub>:MeOH 30:1) affording pure **2** ( $R_f = 0.21$ , 119 mg, 0.29 mmol, 98% over two steps) as a colorless oil [for an alternative synthesis see of compound **2** W.-C. Cheng, C.-Y. Wenga, W.-Y. Yun, S.-Y. Chang, Y.-C. Lin, F.-J. Tsai, F.-Y. Huang and Y.-R. Chen, *Bioorg. Med. Chem*, 2013, **21**, 5021].

A solution of **2** (175 mg, 0.43 mmol), 1-azido-6-bromohexane (**3**, 134 mg, 0.65 mmol) and TEA (120 μL, 0.86 mmol) in 4 ml of THF was stirred in microwave at 150 °C. After 2 h a TLC analysis (CH<sub>2</sub>Cl<sub>2</sub>:MeOH 10:1) still showed the presence of the starting material ( $R_f = 0.51$ ), then 0.5 equivalents of 1-azido-6-bromohexane (**3**) were added and the reaction mixture was stirred in microwave at 150 °C for another 2 h until complete formation of the desired product ( $R_f = 0.98$ , CH<sub>2</sub>Cl<sub>2</sub>:MeOH 10:1) was achieved. After evaporation under reduced pressure, the crude was purified by Flash Column Chromatography (EP:AcOEt 4:1) affording pure **4** ( $R_f = 0.31$ , 203 mg, 0.38 mmol, 88%) as a yellow oil.  $[\alpha]_D^{30} = -25.1$  (c

= 1.30, CHCl<sub>3</sub>); <sup>1</sup>H-NMR (400 MHz, CDCl<sub>3</sub>): δ = 7.35-7.25 (m, 15H, H-Ar), 4.57-4.42 (m, 6H, H-Bn), 3.92 (d, *J* = 4.8 Hz, 1H, H-4), 3.88 (d, *J* = 3.9 Hz, 1H, H-3), 3.62-3.50 (m, 1H, Ha-6), 3.52 (dd, *J* = 9.8, 6.3 Hz, 1H, Hb-6), 3.24 (t, *J* = 7.1 Hz, 2H, H-12), 3.24-3.19 (m, 1H, Ha-5), 2.88-2.81 (m, 1H, Ha-7), 2.71 (bs, 1H, H-2), 2.55 (dd, *J* = 10.3, 4.9 Hz, 1H, Hb-5), 2.38-2.31 (m, 1H, Hb-7), 1.59 (quint, *J* = 7.1 Hz, 2H, H-11), 1.54-1.48 (m, 2H, H-8), 1.41-1.25 (m, 4H, H-9 and H-10); <sup>13</sup>C-NMR (50 MHz, CDCl<sub>3</sub>): δ = 138.5, 138.4, 138.3 (s, 3C, C-Ar), 128.3-127.6 (d, 15C, C-Ar), 85.5 (d, C-3), 81.7 (d, C-4), 73.2 (t, C-Bn) 71.3 (t, C-Bn), 71.2 (t, C-Bn), 71.0 (t, C-6), 69.4 (d, C-2), 57.3 (t, C-5), 55.5 (t, C-7), 51.4 (t, C-12), 28.8 (t, C-11), 28.0 (t, C-8), 27.0, 26.6 (t, 2C, C-9 and C-10); IR (CDCl<sub>3</sub>): ν = 3088, 3066, 3032, 3009, 2937, 2862, 1496, 1453, 1365, 1261, 1096 cm<sup>-1</sup>; MS (ESI): *m/z* 529.42 ([M+1]<sup>+</sup>; 100), 551.42 ([M+Na]<sup>+</sup>; 38); elemental analysis calcd (%) for C<sub>32</sub>H<sub>40</sub>N<sub>4</sub>O<sub>3</sub> (528.68): C 72.70, H 7.63, N 10.60; found: C 72.32, H 7.23, N 10.59.

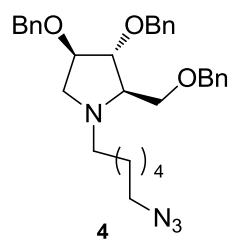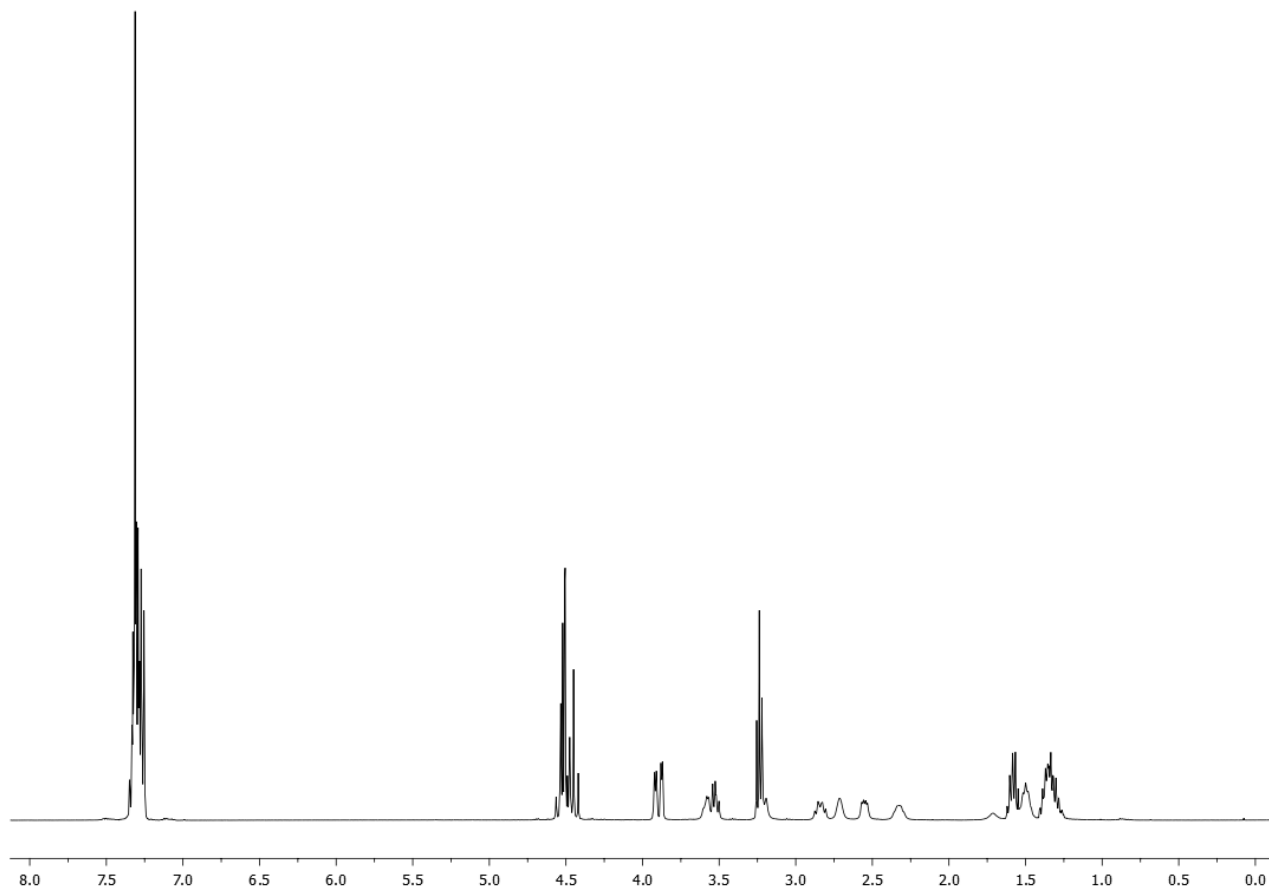

**<sup>1</sup>H-NMR spectrum of compound 4 (400 MHz, CDCl<sub>3</sub>)**

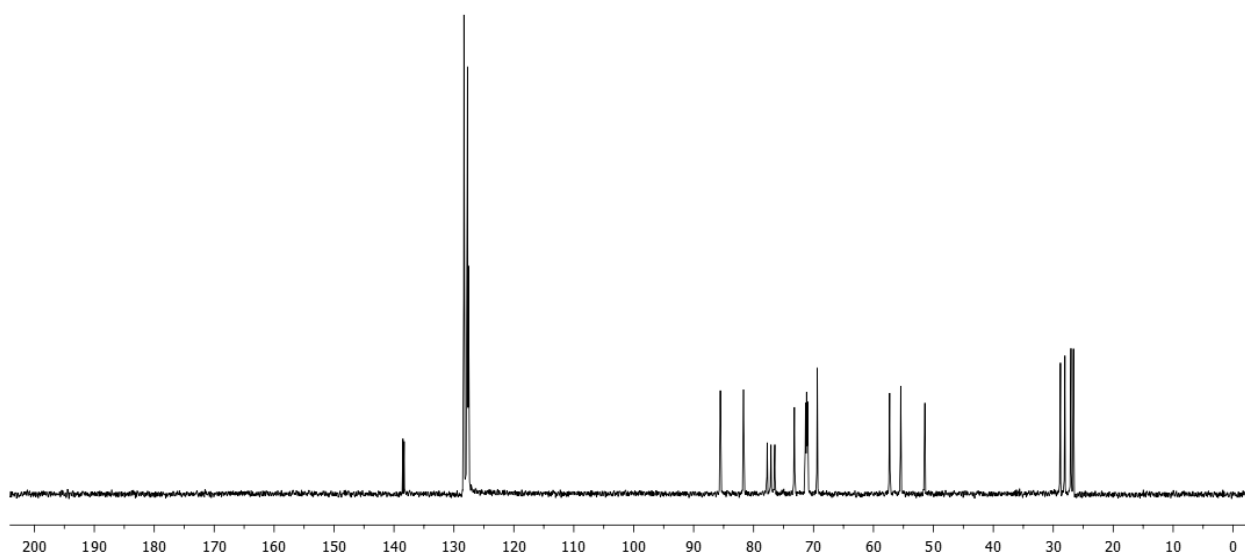

**<sup>13</sup>C-NMR spectrum of compound 4 (50 MHz, CDCl<sub>3</sub>)**

**Synthesis of (2*R*, 3*R*, 4*R*)-1-hexyl[4-(hydroxyethyl)-1*H*-1,2,3-triazol-1-yl]-3,4-bis(benzyloxy)-2-[(benzyloxy)methyl]-pyrrolidine**

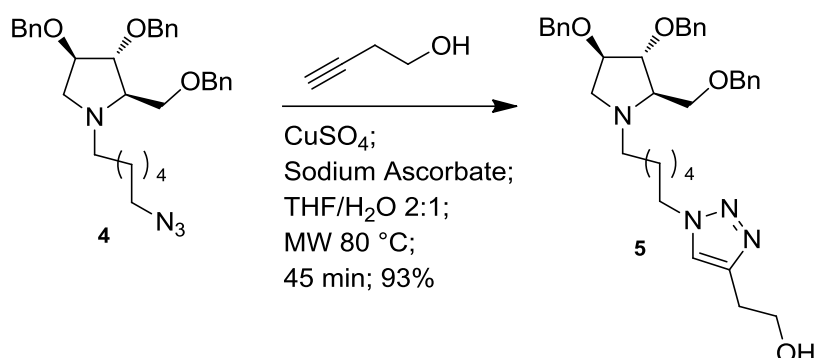

To a solution of **4** (64 mg, 0.12 mmol) in 3 ml of 2:1 THF-H<sub>2</sub>O CuSO<sub>4</sub> (30 mol%, 6 mg, 0.04 mmol), sodium ascorbate (60 mol%, 14 mg, 0.07 mmol) and 3-butyn-1-ol (9 mg, 0.13 mmol) were added. The reaction mixture was stirred in microwave at 80 °C for 45 min, until a TLC analysis (EP:AcOEt 3:1) showed the disappearance of the starting material ( $R_f = 0.49$ ) and the formation of a new product ( $R_f = 0.00$ ). After filtration through Celite<sup>®</sup>, the solvent was removed under reduced pressure and the crude was purified by Flash Column Chromatography (AcOEt) affording pure **5** ( $R_f = 0.23$ , 67 mg, 0.11 mmol, 93%) as a yellow oil.  $[\alpha]_D^{26} = -20.3$  ( $c = 0.94$ , CHCl<sub>3</sub>); <sup>1</sup>H-NMR (400 MHz, CDCl<sub>3</sub>):  $\delta = 7.34$  (s, 1H, H-Triazole), 7.34-7.25 (m, 15H, H-Ar), 4.56-4.42 (m, 6H, H-Bn), 4.27 (t,  $J = 7.1$  Hz, 2H, H-12), 3.93-3.90 (m, 1H, H-4), 3.91 (t,  $J = 6.0$  Hz, 2H, CH<sub>2</sub>OH), 3.88-3.87 (m, 1H, H-3), 3.58 (dd,  $J = 9.7, 5.3$  Hz, 1H, Ha-6), 3.52 (dd,  $J = 9.7, 6.6$  Hz, 1H, Hb-6), 3.22-3.19 (m, 1H, Ha-5), 2.93 (t,  $J = 6.0$  Hz, 2H, CH<sub>2</sub>CH<sub>2</sub>OH), 2.86-2.79 (m, 1H, Ha-7), 2.74-2.72 (m, 1H, H-2), 2.55 (dd,  $J = 10.6, 5.1$  Hz, 1H, Hb-5), 2.36-2.29 (m, 1H, Hb-7), 1.86 (quint,  $J = 7.0$  Hz, 2H, H-11), 1.54-1.42 (m, 2H, H-8), 1.38-1.22 (m, 4H, H-9 and H-10); <sup>13</sup>C-NMR (50 MHz, CDCl<sub>3</sub>):  $\delta = 145.5$  (s, C-Triazole), 138.4, 138.1, 138.0 (s, 3C, C-Ar), 128.3-127.5 (d, 15C, C-Ar), 121.4 (d, C-Triazole), 85.4 (d, C-3), 81.6 (d, C-4), 73.2 (t, C-Bn) 71.3 (t, C-Bn), 71.0 (t, 2C, C-Bn and C-6), 69.4 (d, C-2), 61.5 (t, CH<sub>2</sub>OH), 57.2 (t, C-5), 55.4 (t, C-7), 50.1 (t, C-12), 30.2 (t, C-11), 28.8 (t, CH<sub>2</sub>CH<sub>2</sub>OH), 27.8 (t, C-8), 26.8, 26.3 (t, C-9 and C-10); IR (CDCl<sub>3</sub>):  $\nu = 3620, 3466, 3088, 3066, 3031, 2936, 2862, 1496, 1453, 1310, 1207, 1098$  cm<sup>-1</sup>; MS (ESI):  $m/z$  599.50 ([M+1]<sup>+</sup>; 100), 621.42 ([M+Na]<sup>+</sup>; 28); elemental analysis calcd (%) for C<sub>36</sub>H<sub>46</sub>N<sub>4</sub>O<sub>4</sub> (598.77): C 72.21, H 7.74, N 9.36; found: C 72.06, H 7.52, N 9.27.

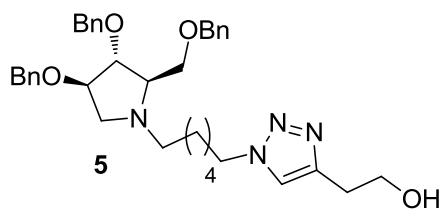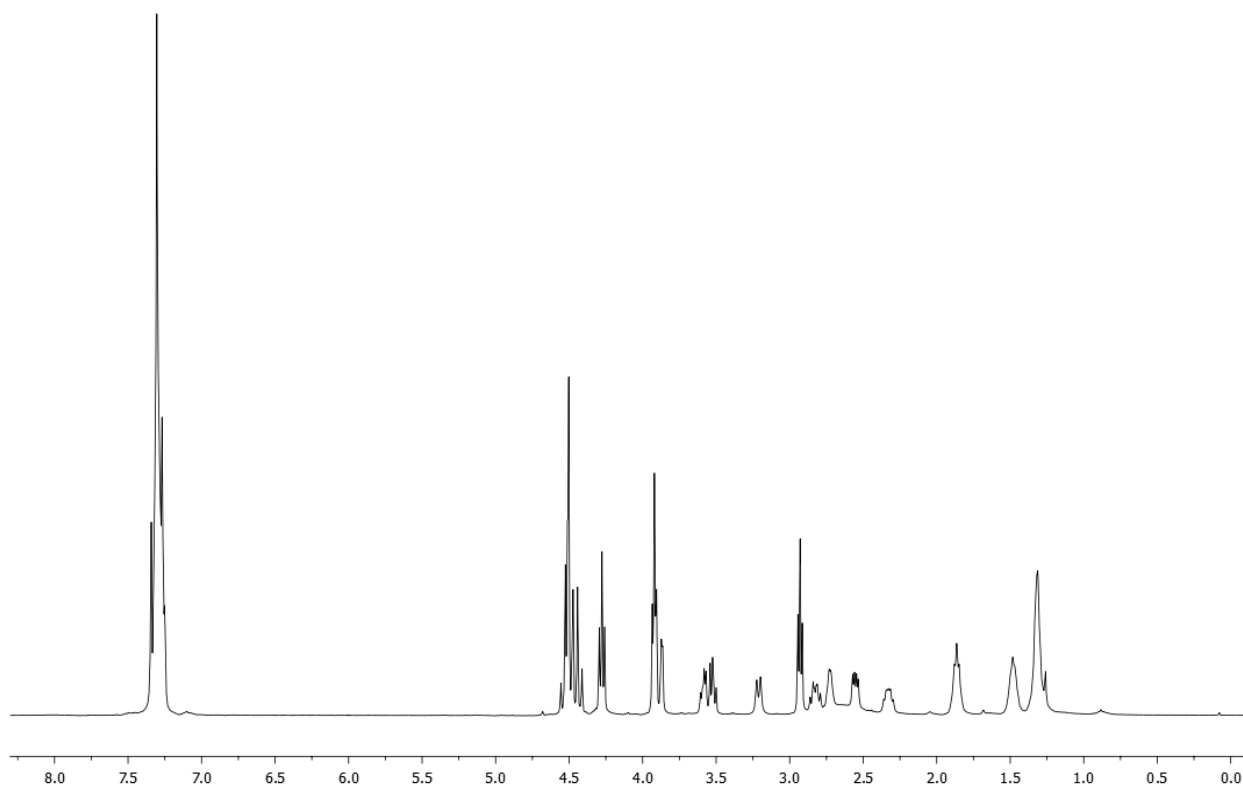

<sup>1</sup>H-NMR spectrum of compound 5 (400 MHz, CDCl<sub>3</sub>)

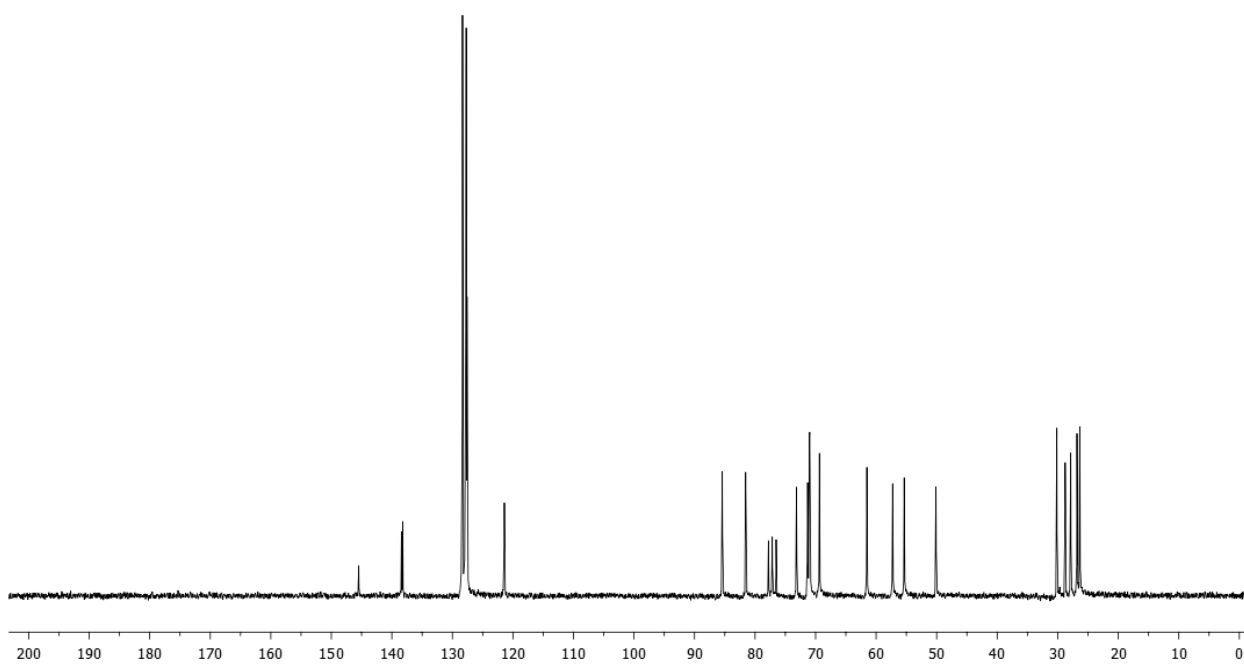

<sup>13</sup>C-NMR spectrum of compound 5 (50 MHz, CDCl<sub>3</sub>)

**Synthesis of (2*R*, 3*R*, 4*R*)-1-hexyl[4-(hydroxyethyl)-1*H*-1,2,3-triazol-1-yl]-3,4-bis(hydroxy)-2-[(hydroxy)methyl]-pyrrolidine**

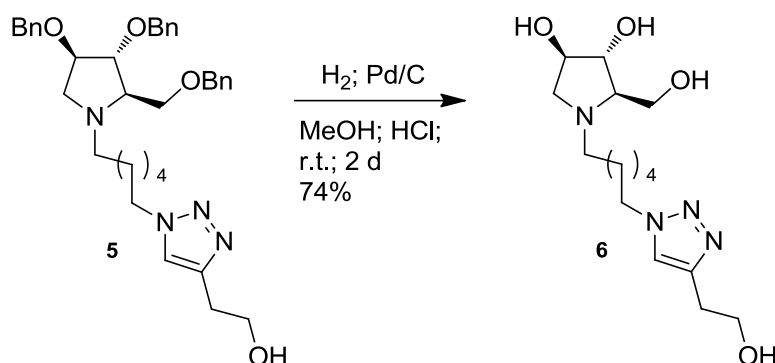

To a solution of **5** (63 mg, 0.105 mmol) in 15 ml of methanol, 32 mg of 10% Pd/C and two drops of 37% HCl were added under nitrogen atmosphere, then the mixture was stirred under hydrogen atmosphere at room temperature for two days, until a NMR control showed the disappearance of the starting material. The mixture was then filtered through Celite® and the solvent was removed under reduced pressure affording a crude yellow oil. Free amine was obtained by passing the hydrochloride salt through a Dowex 50WX8 ion-exchange resin. Elution with 6% NH<sub>4</sub>OH afforded the free base **6** (25 mg, 0.076 mmol, 74%) as a yellow oil.  $[\alpha]_{\text{D}}^{23} = -15.7$  ( $c = 0.21$ , MeOH); <sup>1</sup>H-NMR (400 MHz, D<sub>2</sub>O):  $\delta = 7.69$  (s, 1H, H-Triazole), 4.26 (t,  $J = 6.8$  Hz, 2H, H-12), 4.04-4.03 (m, 1H, H-4), 3.85-3.83 (m, 1H, H-3), 3.72 (t,  $J = 6.6$  Hz, 2H, CH<sub>2</sub>OH), 3.64 (d,  $J = 5.4$  Hz, 2H, H-6), 3.04 (d,  $J = 11.2$  Hz, 1H, Ha-5), 2.86-2.76 (m, 2H, Hb-5 and Ha-7), 2.80 (t,  $J = 6.4$  Hz, 2H, CH<sub>2</sub>CH<sub>2</sub>OH), 2.68-2.62 (m, 1H, H-2), 2.45-2.39 (m, 1H, Hb-7), 1.76 (quint,  $J = 6.7$  Hz, 2H, H-11), 1.46-1.32 (m, 2H, H-8), 1.24-1.08 (m, 4H, H-9 and H-10); <sup>13</sup>C-NMR (50 MHz, D<sub>2</sub>O):  $\delta = 145.2$  (s, C-Triazole), 123.8 (d, C-Triazole), 78.3 (d, C-3), 75.0 (d, C-4), 72.8 (d, C-2), 60.6 (t, CH<sub>2</sub>OH), 60.5 (t, C-6), 58.4 (t, C-5), 55.6 (t, C-7), 50.2 (t, C-12), 29.1 (t, C-11), 27.8 (t, CH<sub>2</sub>CH<sub>2</sub>OH), 25.9, 25.8, 25.2 (t, 3C, C-8, C-9 and C-10); MS (ESI):  $m/z$  329.17 ([M+1]<sup>+</sup>; 94), 351.08 ([M+Na]<sup>+</sup>; 100); elemental analysis calcd (%) for C<sub>15</sub>H<sub>28</sub>N<sub>4</sub>O<sub>4</sub> (328.41): C 54.86, H 8.59, N 17.06; found: C 54.79, H 8.57, N 17.09.



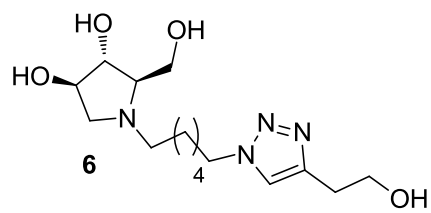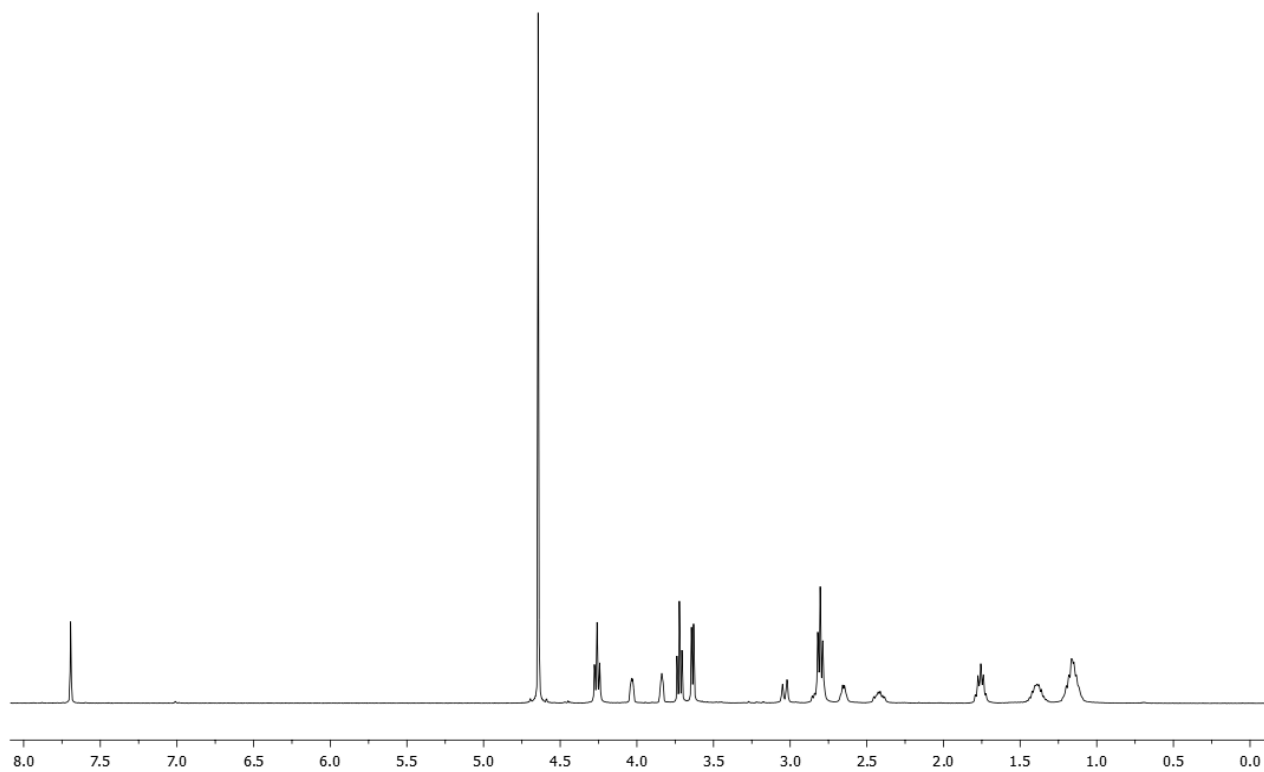

**<sup>1</sup>H-NMR spectrum of compound 6 (400 MHz, D<sub>2</sub>O)**

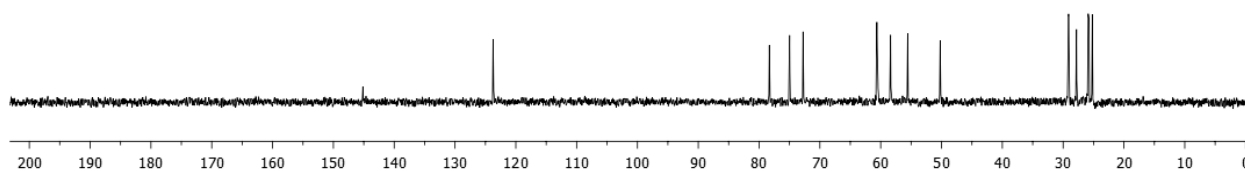

**<sup>13</sup>C-NMR spectrum of compound 6 (50 MHz, D<sub>2</sub>O)**

**Synthesis of (2*R*,3*R*,4*R*)-1-[6-azido]hexyl]-3-hydroxymethylhexahydro-1*H*-pyrrolidine-1,2-diol**

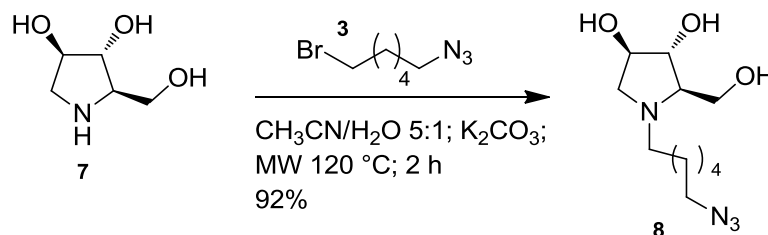

A solution of **7** (111 mg, 0.83 mmol), 1-azido-6-bromohexane (**3**, 258 mg, 1.25 mmol) and  $\text{K}_2\text{CO}_3$  (173 mg, 1.25 mmol) in 6 ml of a mixture  $\text{CH}_3\text{CN}/\text{H}_2\text{O}$  5:1 was stirred in microwave at  $120^\circ\text{C}$  for 2 h, until a TLC analysis ( $\text{CH}_2\text{Cl}_2$ :MeOH 2:1 + 1% v/v 6%  $\text{NH}_4\text{OH}$ ) showed the disappearance of the starting material ( $R_f = 0.42$ ) and the formation of a new product ( $R_f = 0.98$ ). After filtration through Celite<sup>®</sup>, the solvent was removed under reduced pressure and the crude was purified by Flash Column Chromatography ( $\text{CH}_2\text{Cl}_2$ :MeOH 6:1 + 1% v/v 6%  $\text{NH}_4\text{OH}$ ) affording pure **8** ( $R_f = 0.20$ , 197 mg, 0.76 mmol, 92%) as a yellow oil.  $[\alpha]_{\text{D}}^{29} = -23.3$  ( $c = 0.36$ , MeOH);  $^1\text{H-NMR}$  (400 MHz,  $\text{D}_2\text{O}$ ):  $\delta = 3.99\text{-}3.97$  (m, 1H, H-4), 3.81-3.79 (m, 1H, H-3), 3.63-3.55 (m, 2H, H-6), 3.20 (t,  $J = 6.9$  Hz, 2H, H-12), 2.89 (d,  $J = 10.7$  Hz, 1H, Ha-5), 2.71 (td,  $J = 11.2, 5.8$  Hz, 1H, Ha-7), 2.63 (dd,  $J = 11.2, 5.9$ , 1H, Hb-5), 2.42 (q,  $J = 5.3$  Hz, 1H, H-2), 2.26 (td,  $J = 11.2, 5.3$  Hz, 1H, Hb-7), 1.53-1.46 (m, 2H, H-11), 1.44-1.34 (m, 2H, H-8), 1.32-1.17 (m, 4H, H-9 and H-10);  $^{13}\text{C-NMR}$  (50 MHz,  $\text{D}_2\text{O}$ ):  $\delta = 79.4$  (d, C-3), 75.6 (d, C-4), 72.1 (d, C-2), 61.4 (t, C-6), 58.5 (t, C-5), 55.4 (t, C-7), 51.4 (t, C-12), 28.0 (t, C-11), 26.7 (t, C-8), 26.4, 25.9 (t, 2C, C-9 and C-10); MS (ESI):  $m/z$  281.25 ( $[\text{M}+\text{Na}]^+$ ; 100); elemental analysis calcd (%) for  $\text{C}_{11}\text{H}_{22}\text{N}_4\text{O}_3$  (258.32): C 51.15, H 8.58, N 21.69; found: C 51.08, H 8.35, N 21.54.

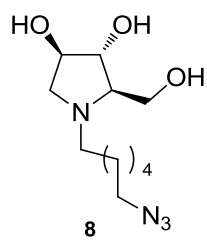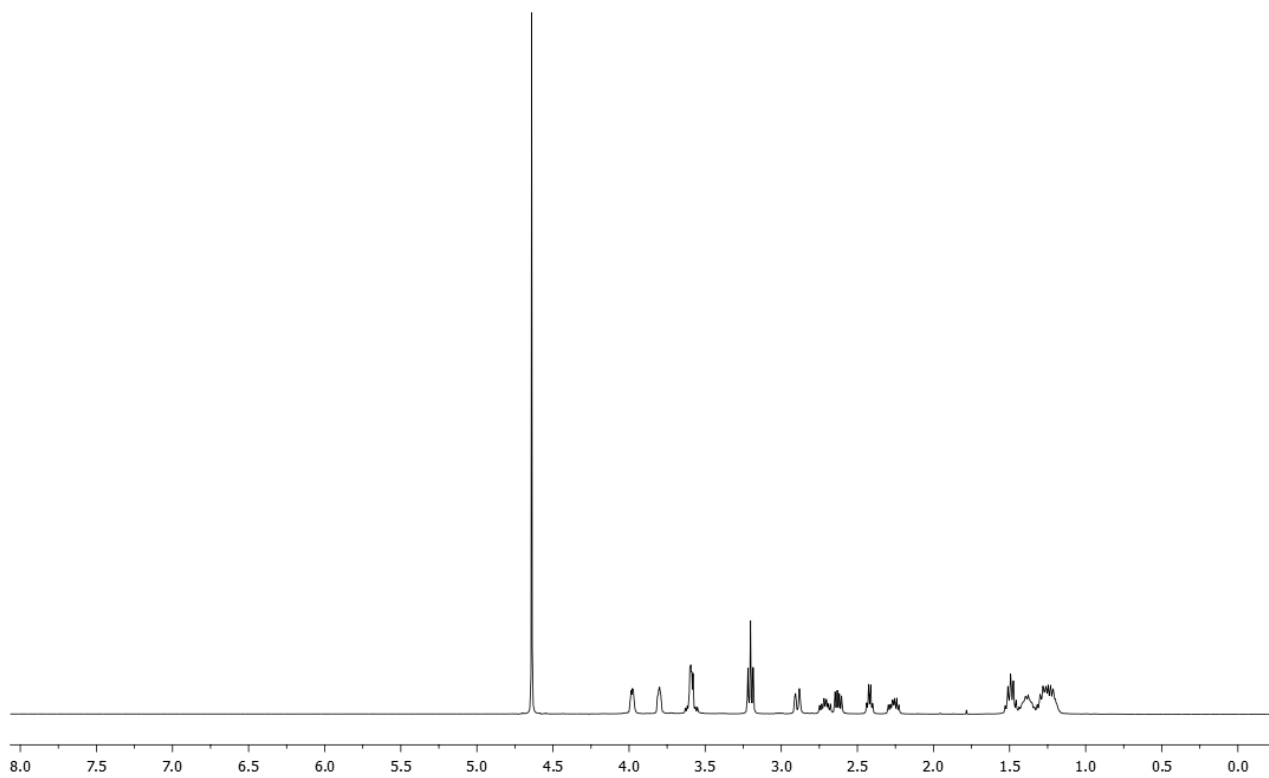

**<sup>1</sup>H-NMR spectrum of compound 8 (400 MHz, D<sub>2</sub>O)**

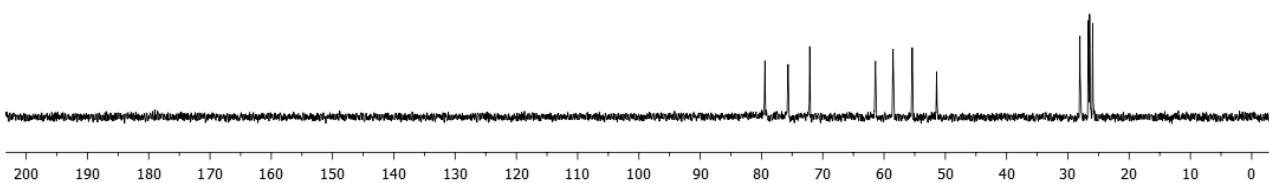

**<sup>13</sup>C-NMR spectrum of compound 8 (50 MHz, D<sub>2</sub>O)**

## Synthesis of nonavalent pyrrolidine iminosugars **10**

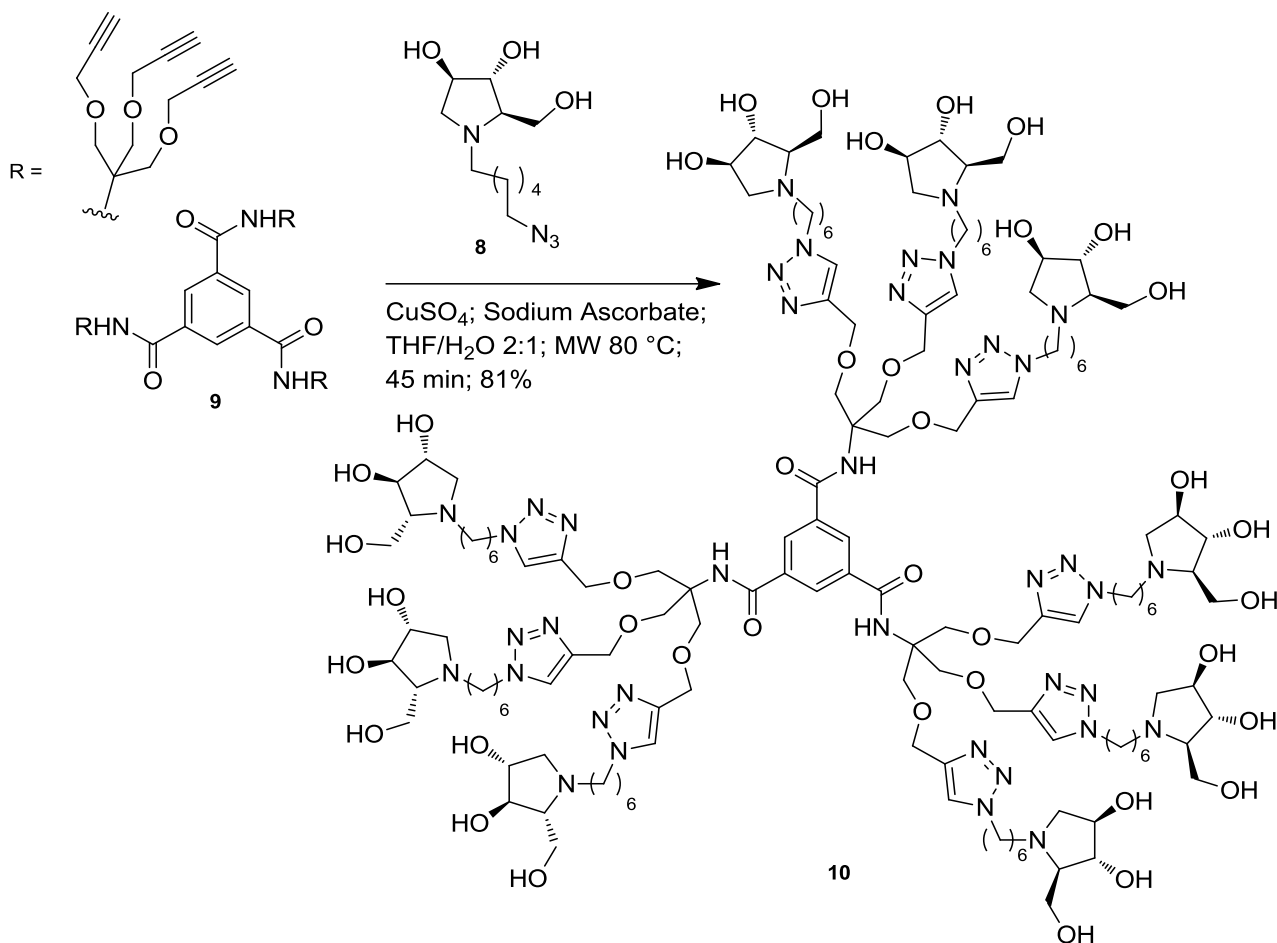

To a solution of **8** (169 mg, 0.65 mmol) in 7.5 ml of 2:1 THF/ $\text{H}_2\text{O}$   $\text{CuSO}_4$  (30 mol%, 3 mg, 0.02 mmol), sodium ascorbate (60 mol%, 8 mg, 0.04 mmol) and **9** (60 mg, 0.07 mmol) were added. The reaction mixture was stirred in microwave at 80 °C for 45 min, until a TLC analysis (EP:AcOEt 1:1) showed the disappearance of the starting material ( $R_f = 0.74$ ) and the formation of a new product ( $R_f = 0.00$ ). After filtration through Celite®, the solvent was removed under reduced pressure and the crude was purified by Flash Column Chromatography (MeOH: $\text{CH}_2\text{Cl}_2$ : $\text{NH}_4\text{OH}$  2:1:0.5) and Size Exclusion Chromatography Sephadex LH-20 (eluting with  $\text{H}_2\text{O}$ ) affording pure **10** ( $R_f = 0.88$ , 182 mg, 0.057 mmol, 81%) as a yellow oil.  $[\alpha]_{\text{D}}^{28} = -4.2$  ( $c = 0.9$ ,  $\text{H}_2\text{O}$ );  $^1\text{H-NMR}$  (400 MHz,  $\text{D}_2\text{O}$ ):  $\delta = 7.85$  (s, 3H, H-Ar), 7.75 (s, 9H, H-Triazole), 4.43 (s, 18H,  $\text{OCH}_2\text{Triazole}$ ), 4.14-4.13 (m, 9H, H-4), 4.10 (t,  $J = 7.1$  Hz, 18H, H-12), 3.92-3.91 (m, 9H, H-3), 3.79 (dd,  $J = 12.4, 5.2$  Hz, 9H, Ha-6), 3.73 (dd,  $J = 12.4, 7.6$  Hz, 9H, Hb-6), 3.69 (s, 18H,  $\text{CCH}_2\text{O}$ ), 3.44-3.41 (m, 9H, Ha-5), 3.27-3.15 (m, 27H, Hb-5, H-2 and Ha-7), 2.94-2.86 (m, 9H, Hb-7), 1.59 (quint,  $J = 7.2$  Hz, 18H, H-11), 1.52-1.44 (m, 18H, H-8), 1.16-1.00 (m, 36H, H-9 and H-10);  $^{13}\text{C-NMR}$  (50 MHz,  $\text{D}_2\text{O}$ ):  $\delta = 167.0$  (s, 3C, C=O), 143.0 (s, 9C, C-Triazole), 134.2 (s, 3C, C-Ar), 128.5-

128.1 (d, 3C, C-Ar), 123.9 (d, 9C, C-Triazole), 75.2 (d, 9C, C-3), 74.3 (d, 9C, C-2), 73.0 (d, 9C, C-4), 66.3 (t, 9C, CCH<sub>2</sub>O), 62.7 (t, 9C, OCH<sub>2</sub>Triazole), 59.9 (s, 3C, CCH<sub>2</sub>O), 57.9 (t, 9C, C-6), 57.7 (t, 9C, C-5), 55.7 (t, 9C, C-7), 49.3 (t, 9C, C-12), 28.3 (t, 9C, C-11), 24.4, 24.2 (t, 18C, C-9 and C-10), 23.7 (t, 9C, C-8); MS (ESI): m/z 1063.08 ([M+3]<sup>+</sup>; 66); elemental analysis calcd (%) for C<sub>147</sub>H<sub>249</sub>N<sub>39</sub>O<sub>39</sub> (3186.79): C 55.40, H 7.88, N 17.14; found: C 55.21, H 7.64, N 17.01.

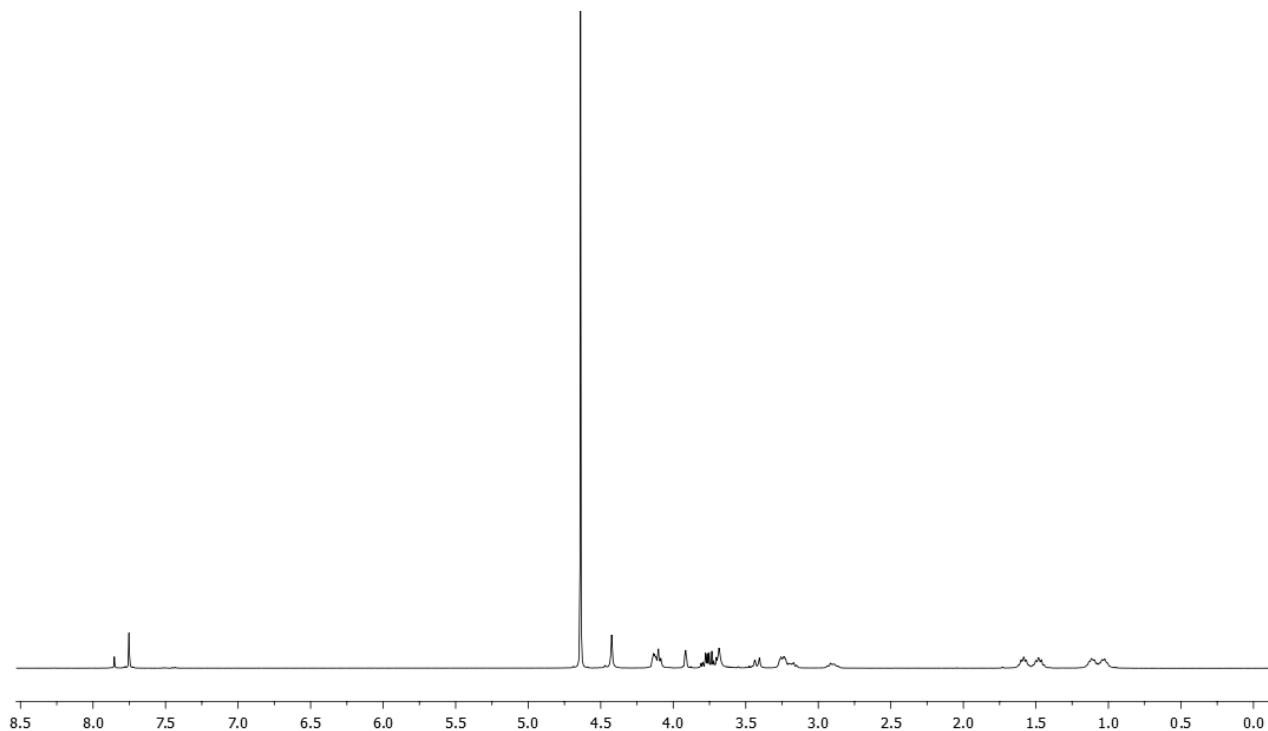

**<sup>1</sup>H-NMR spectrum of compound 10 (400 MHz, D<sub>2</sub>O)**

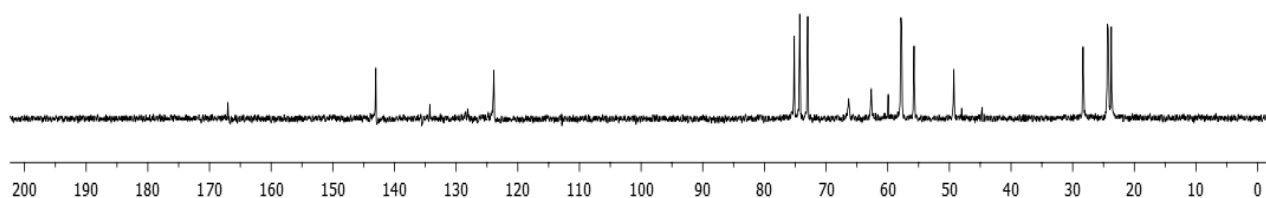

**<sup>13</sup>C-NMR spectrum of compound 10 (50 MHz, D<sub>2</sub>O)**

**Synthesis of (2*R*,3*R*,4*S*)-1-[6-azido]hexyl]-3-hydroxymethylhexahydro-1*H*-pyrrolidine-1,2-diol**

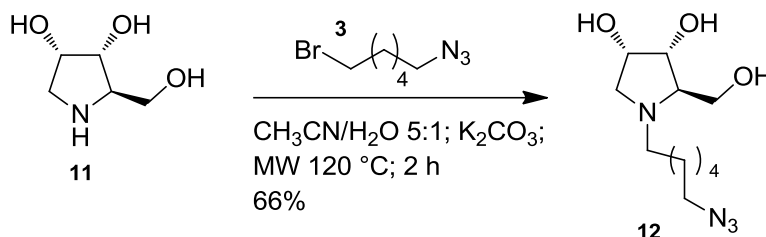

A solution of **11** (43 mg, 0.32 mmol), 1-azido-6-bromohexane (**3**, 98 mg, 0.48 mmol) and  $\text{K}_2\text{CO}_3$  (66 mg, 0.48 mmol) in 3 ml of a mixture  $\text{CH}_3\text{CN}/\text{H}_2\text{O}$  5:1 was stirred in microwave at 120°C for 2 h, until a TLC analysis ( $\text{CH}_2\text{Cl}_2$ :MeOH 2:1 + 1% v/v 6%  $\text{NH}_4\text{OH}$ ) showed the disappearance of the starting material ( $R_f = 0.42$ ) and the formation of a new product ( $R_f = 0.98$ ). After filtration through Celite®, the solvent was removed under reduced pressure and the crude was purified by Flash Column Chromatography ( $\text{CH}_2\text{Cl}_2$ :MeOH 5:1 + 1% v/v 6%  $\text{NH}_4\text{OH}$ ) affording pure **12** ( $R_f = 0.31$ , 53 mg, 0.21 mmol, 66%) as a yellow oil.  $[\alpha]_{\text{D}}^{23} = -28.3$  ( $c = 0.70$ , MeOH);  $^1\text{H-NMR}$  (400 MHz,  $\text{CD}_3\text{OD}$ ):  $\delta = 4.06\text{-}4.00$  (m, 1H, H-4), 3.85 (t,  $J = 5.1$  Hz, 1H, H-3), 3.60-3.55 (m, 2H, H-6), 3.30-3.23 (m, 3H, H-12 and Ha-5), 2.83 (ddd,  $J = 11.9, 8.8, 7.3$  Hz, 1H, Ha-7), 2.58 (q,  $J = 4.7$  Hz, 1H, H-2), 2.46-2.40 (m, 2H, Hb-7 e Hb-5), 1.63-1.56 (m, 2H, H-11), 1.55-1.48 (m, 2H, H-8), 1.44-1.28 (m, 4H, H-9 e H-10);  $^{13}\text{C-NMR}$  (50 MHz,  $\text{CD}_3\text{OD}$ ):  $\delta = 72.7$  (d, C-3), 71.4 (d, C-2), 69.5 (d, C-4), 61.3 (t, C-6), 57.6 (t, C-5), 55.6 (t, C-7), 51.0 (t, C-12), 28.5 (t, C-11), 27.5 (t, C-8), 26.6, 26.3 (t, 2C, C-9 and C-10); MS (ESI):  $m/z$ : 259.17 ( $[\text{M}+1]^+$ ; 100); elemental analysis calcd (%) for  $\text{C}_{11}\text{H}_{22}\text{N}_4\text{O}_3$  (258.32): C 51.15, H 8.58, N 21.69; found: C 51.12, H 8.54, N 21.66.

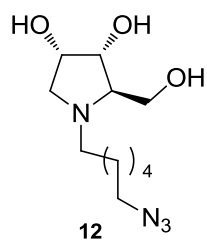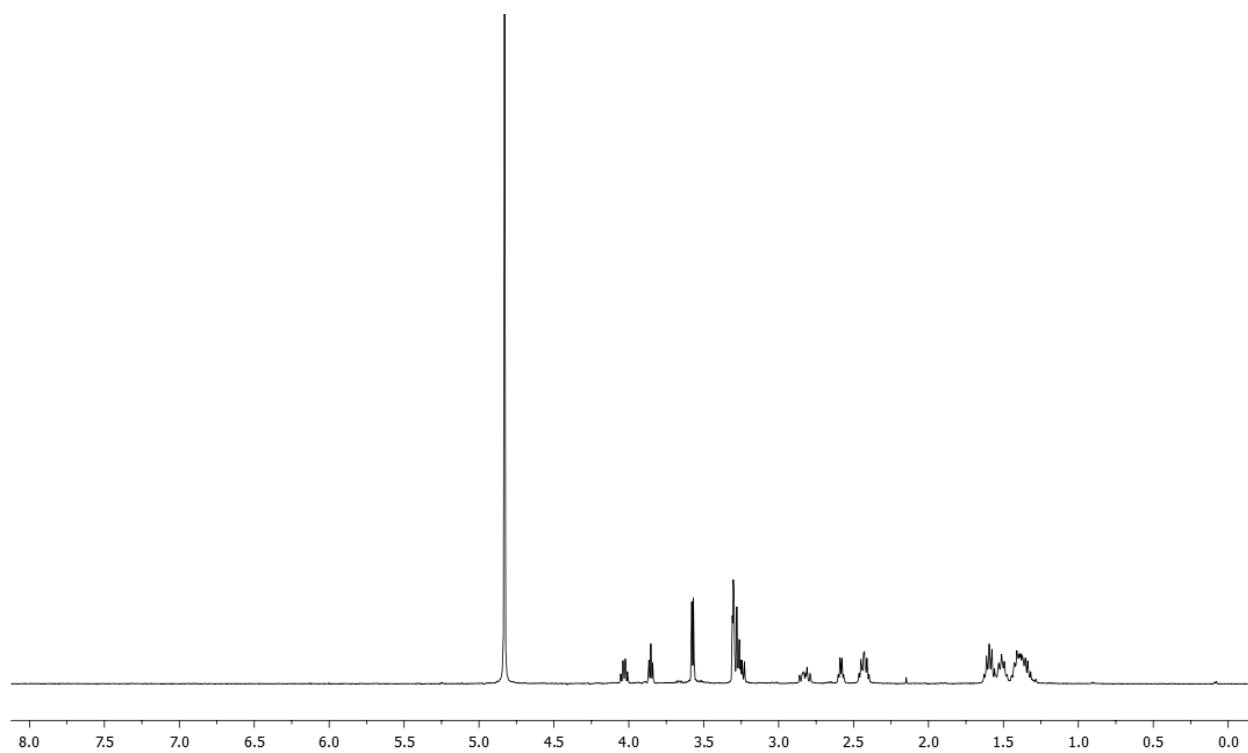

<sup>1</sup>H-NMR spectrum of compound 12 (400 MHz, CD<sub>3</sub>OD)

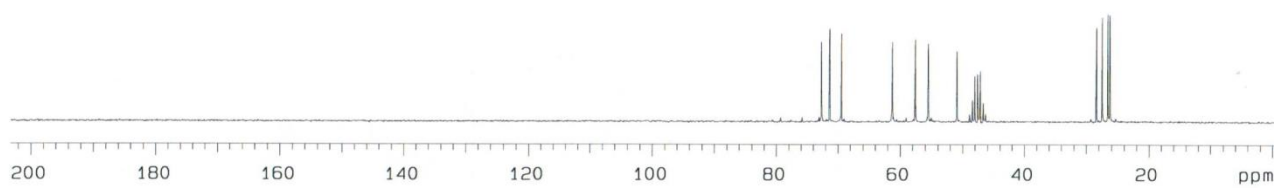

<sup>13</sup>C-NMR spectrum of compound 12 (50 MHz, CD<sub>3</sub>OD)

**Synthesis of (2*R*, 3*R*, 4*S*)-1-hexyl[4-(hydroxyethyl)-1*H*-1,2,3-triazol-1-yl]-3,4-bis(hydroxy)-2-[(hydroxy)methyl]-pyrrolidine**

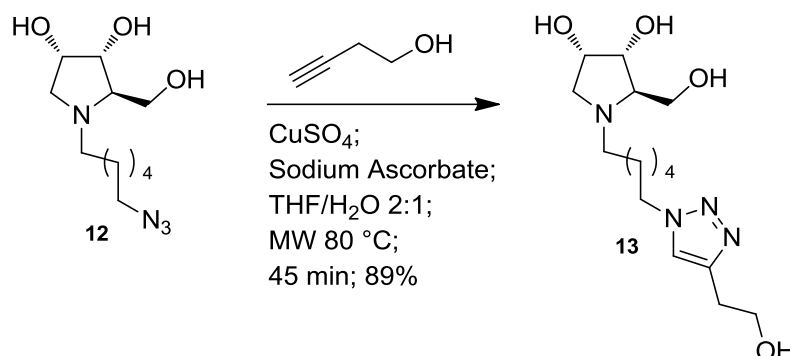

To a solution of **12** (64 mg, 0.22 mmol) in 6 ml of 2:1 THF/H<sub>2</sub>O CuSO<sub>4</sub> (30 mol%, 11 mg, 0.07 mmol), sodium ascorbate (60 mol%, 26 mg, 0.13 mmol) and 3-butyn-1-ol (20  $\mu$ L, 0.26 mmol) were added. The reaction mixture was stirred in microwave at 80  $^\circ$ C for 45 min, until a TLC analysis (CH<sub>2</sub>Cl<sub>2</sub>:MeOH 6:1 + 1% v/v 6% NH<sub>4</sub>OH) showed the disappearance of the starting material ( $R_f$  = 0.22) and the formation of a new product ( $R_f$  = 0.00). After filtration through Celite<sup>®</sup>, the solvent was removed under reduced pressure and the crude was purified by Flash Column Chromatography (CH<sub>2</sub>Cl<sub>2</sub>:MeOH 6:1 + 1% v/v 6% NH<sub>4</sub>OH) affording pure **13** ( $R_f$  = 0.13, 64 mg, 0.19 mmol, 89%) as a yellow oil.  $[\alpha]_D^{22}$  = -10.0 ( $c$  = 0.67, MeOH); <sup>1</sup>H-NMR (400 MHz, D<sub>2</sub>O): 7.65 (s, 1H, H-Triazole), 4.22 (t,  $J$  = 6.9 Hz, 2H, H-12), 3.99 (q,  $J$  = 5.8 Hz, 1H, H-4), 3.80 (t,  $J$  = 5.4 Hz, 1H, H-3), 3.68 (t,  $J$  = 6.4 Hz, 2H, CH<sub>2</sub>OH), 3.58-3.45 (m, 2H, H-6), 3.19 (dd,  $J$  = 10.7, 5.9 Hz, 1H, Ha-5), 2.76 (t,  $J$  = 6.4 Hz, 2H, CH<sub>2</sub>CH<sub>2</sub>OH), 2.76-2.71 (m, 1H, Ha-7), 2.66 (q,  $J$  = 5.2 Hz, 1H, H-2), 2.45 (dd,  $J$  = 10.7, 6.8 Hz, 1H, Hb-5), 2.39 (td,  $J$  = 11.7, 5.4 Hz, 1H, Hb-7), 1.75-1.68 (m, 2H, H-11), 1.39-1.27 (m, 2H, H-8), 1.17-1.05 (m, 4H, H-9 and H-10); <sup>13</sup>C-NMR (100 MHz, D<sub>2</sub>O):  $\delta$  = 145.2 (s, C-Triazole), 123.8 (d, C-Triazole), 72.1 (d, C-3), 70.8 (d, C-2), 69.0 (d, C-4), 60.7, 59.9 (t, C-6 and CH<sub>2</sub>OH), 56.9 (t, C-5), 56.2 (t, C-7), 50.2 (t, C-12), 29.1 (t, C-11), 27.8 (t, CH<sub>2</sub>CH<sub>2</sub>OH), 25.8, 25.7, 25.2 (t, 3C, C-8, C-9 and C-10); MS (ESI):  $m/z$  329.40 ([M+1]<sup>+</sup>; 32), 351.36 ([M+Na]<sup>+</sup>; 100); elemental analysis calcd (%) for C<sub>15</sub>H<sub>28</sub>N<sub>4</sub>O<sub>4</sub> (328.41): C 54.86, H 8.59, N 17.06; found: C 54.81, H 8.56, N 17.04.



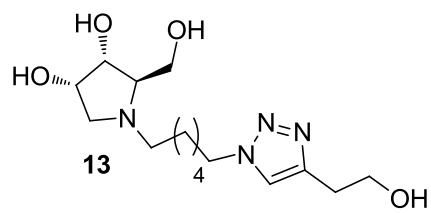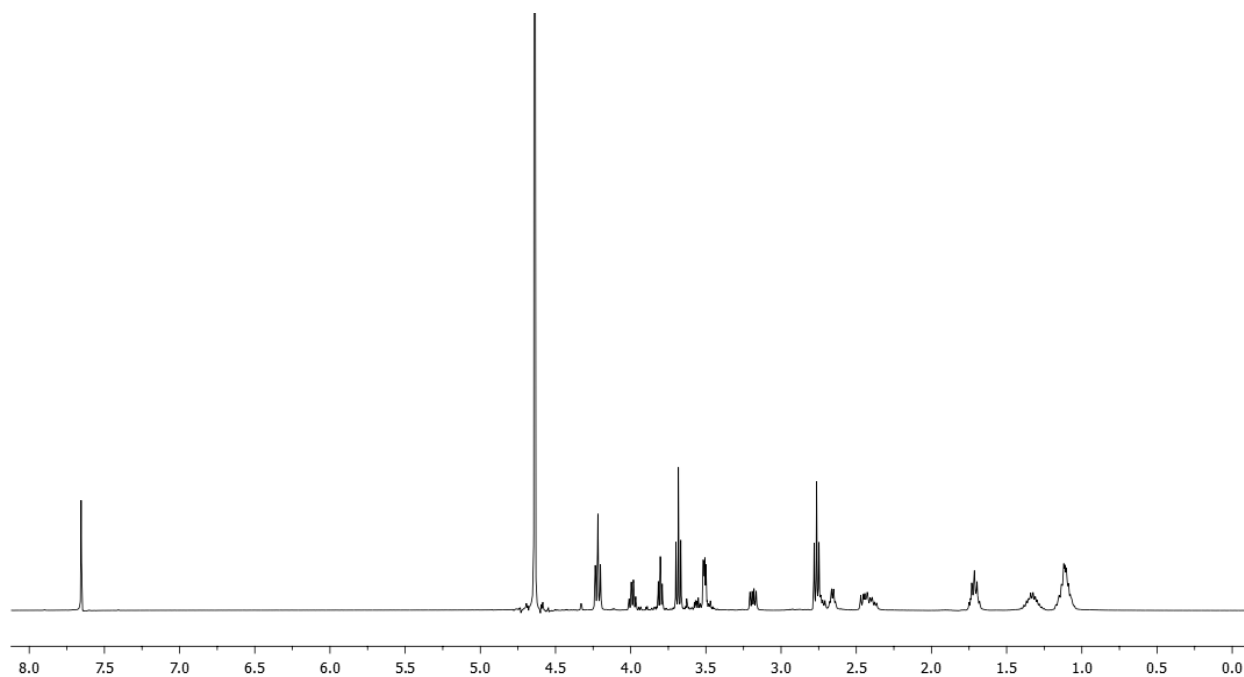

**<sup>1</sup>H-NMR spectrum of compound 13 (400 MHz, D<sub>2</sub>O)**

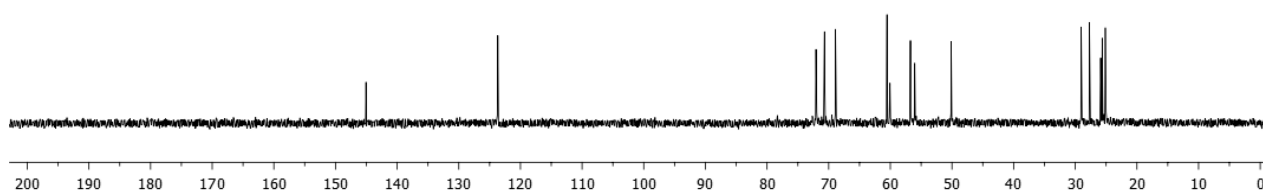

**<sup>13</sup>C-NMR spectrum of compound 13 (100 MHz, D<sub>2</sub>O)**

## Synthesis of nonavalent pyrrolidine iminosugars **14**

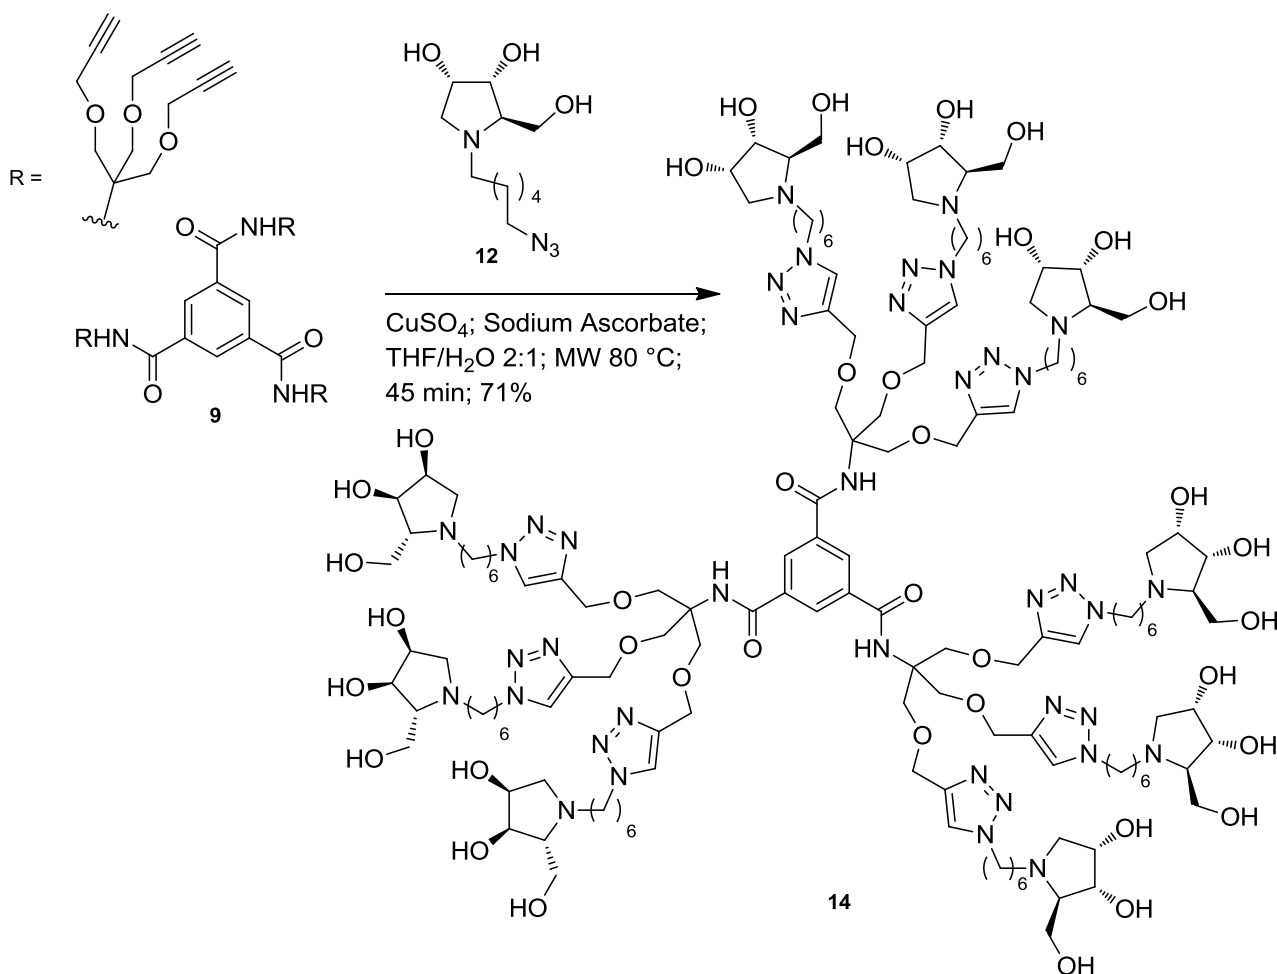

To a solution of **12** (41 mg, 0.158 mmol) in 3 ml of 2:1 THF/ $\text{H}_2\text{O}$   $\text{CuSO}_4$  (30 mol%, 1 mg, 0.005 mmol), sodium ascorbate (60 mol%, 2 mg, 0.010 mmol) and **9** (15 mg, 0.017 mmol) were added. The reaction mixture was stirred in microwave at 80 °C for 45 min, until a TLC analysis (EP/ $\text{AcOEt}$  2:1) showed the disappearance of the starting material ( $R_f = 0.26$ ) and the formation of a new product ( $R_f = 0.00$ ). After filtration through Celite<sup>®</sup>, the solvent was removed under reduced pressure and the crude was purified by Flash Column Chromatography ( $\text{MeOH}:\text{CH}_2\text{Cl}_2:\text{NH}_4\text{OH}$  2:1:0.75) and Size Exclusion Chromatography Sephadex LH-20 (eluting with  $\text{H}_2\text{O}$ ) affording pure **14** ( $R_f = 0.26$ , 38 mg, 0.012 mmol, 71%) as a yellow oil.  $[\alpha]_{\text{D}}^{23} = -2.2$  ( $c = 0.75$ ,  $\text{H}_2\text{O}$ );  $^1\text{H-NMR}$  (400 MHz,  $\text{D}_2\text{O}$ ):  $\delta = 7.86$  (s, 3H, H-Ar), 7.76 (s, 9H, H-Triazole), 4.43 (s, 18H,  $\text{OCH}_2\text{Triazole}$ ), 4.19 (pseudo q,  $J = 4.1$  Hz, 9H, H-4), 4.11 (t,  $J = 6.9$  Hz, 18H, H-12), 4.01 (dd,  $J = 7.3, 4.4$  Hz, 9H, H-3), 3.80 (dd,  $J = 13.1, 3.4$  Hz, 9H, Ha-6), 3.70 (dd,  $J = 13.1, 4.9$  Hz, 9H, Hb-6), 3.69 (s, 18H,  $\text{CCH}_2\text{O}$ ), 3.60 (dd,  $J = 12.7, 4.4$  Hz, 9H, Ha-5), 3.36-3.33 (m, 9H, H-2), 3.21 (dt,  $J = 12.2, 8.3$  Hz, 9H, Ha-7), 3.08 (dd,  $J = 12.7, 2.9$  Hz, 9H, Hb-5), 2.98 (dt,  $J = 12.2, 8.1$  Hz, 9H, Hb-7), 1.64-1.56 (m,

18H, H-11), 1.56-1.44 (m, 18H, H-8), 1.18-0.98 (m, 36H, H-9 and H-10);  $^{13}\text{C}$ -NMR (100 MHz,  $\text{D}_2\text{O}$ ):  $\delta$  = 167.9 (s, 3C, C=O), 143.9 (s, 9C, C-Triazole), 135.2 (s, 3C, C-Ar), 128.9 (d, 3C, C-Ar), 124.7 (d, 9C, C-Triazole), 70.7 (d, 9C, C-3), 70.5 (d, 9C, C-2), 68.6 (d, 9C, C-4), 67.2 (t, 9C,  $\text{CCH}_2\text{O}$ ), 63.5 (t, 9C,  $\text{OCH}_2\text{Triazole}$ ), 60.7 (s, 3C,  $\text{CCH}_2\text{O}$ ), 57.2, 57.1, 57.0 (t, 27C, C-6, C-5 and C-7), 50.1 (t, 9C, C-12), 29.1 (t, 9C, C-11), 25.0, 24.9 (t, 18C, C-9 and C-10), 24.4 (t, 9C, C-8); MS (ESI):  $m/z$  1070.58 ( $[(\text{M}+3)/3]^+$ ; 81); elemental analysis calcd (%) for  $\text{C}_{147}\text{H}_{249}\text{N}_{39}\text{O}_{39}$  (3186.79): C 55.40, H 7.88, N 17.14; found: C 55.29, H 7.74, N 17.02.

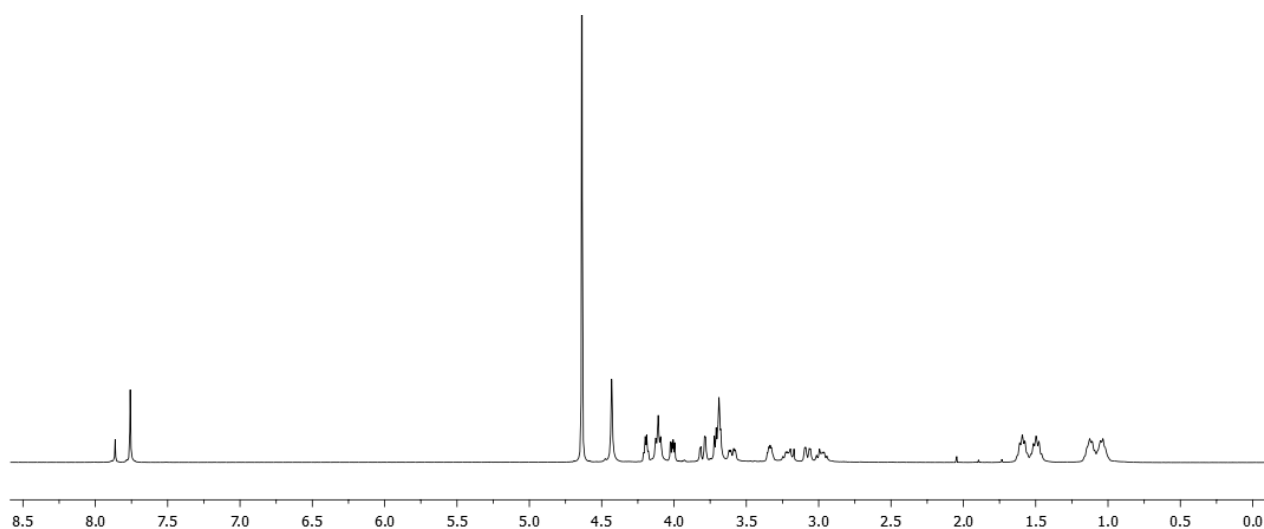

$^1\text{H}$ -NMR spectrum of compound 14 (400 MHz,  $\text{D}_2\text{O}$ )

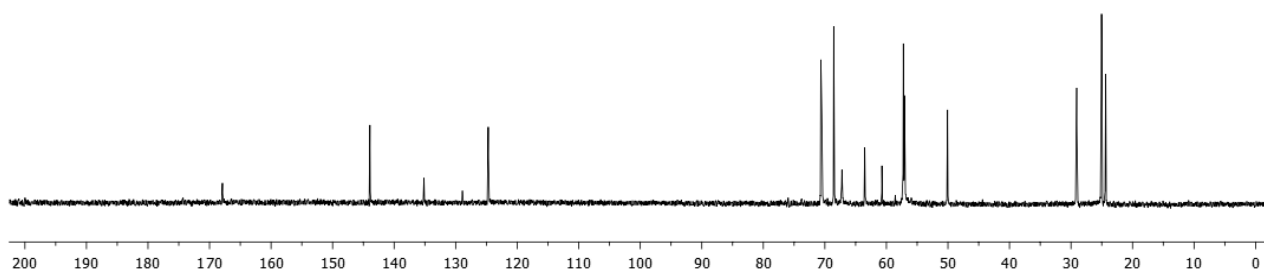

$^{13}\text{C}$ -NMR spectrum of compound 14 (100 MHz,  $\text{D}_2\text{O}$ )

## Biochemical tests on human GALNS and IDS

For nonavalent compounds **10** and **14** and their monovalent counterparts **6** and **13** the percentage of inhibition, at 1 mM concentration, towards GALNS and IDS using leukocyte extracts from healthy donors was evaluated.

Leukocyte pellets were disrupted by sonication in water and the micro BCA protein assay kit (Sigma-Aldrich) was used to set up the protein amount for the enzymatic assay, according to the manufacturer's instructions.

### ***GALNS enzymatic test:***

Enzyme activity was measured by setting the reaction in 0.2 ml tubes and performing the experiments in triplicates as follows:

#### Step 1:

Iminosugars solution (3  $\mu$ l), leukocytes homogenate (7  $\mu$ l) and 20  $\mu$ l of 4-methylumbelliferyl- $\beta$ -galactoside-6-sulphate·Na (Moscerdam Substrates) substrate solution in Na-Acetate/acetic acid buffer (0.1 M/0.1 M, pH 4.3) containing 0.1 M NaCl, 0.02% (w/v) NaN<sub>3</sub> and 5 mM Pb-acetate were incubated for 17 h at 37 °C.

#### Step 2:

After step 1 the tubes were placed on an ice cooler and the reaction was stopped by addition of 5  $\mu$ l of Na-phosphate buffer (0.9 M, pH 4.3) containing 0.02 % of NaN<sub>3</sub> and by efficient mixing with vortex. Then, 10  $\mu$ l of  $\beta$ -Gal-A-10U were added to each sample and the suspension mixed again in vortex apparatus, then samples were incubated for 2 h at 37°C.

At the end of this period the tubes were placed on an ice cooler and the samples were transferred in a cooled flat-bottomed 96 well plate and the reaction was immediately stopped with 200  $\mu$ l of NaHCO<sub>3</sub>/Na<sub>2</sub>CO<sub>3</sub> buffer (0.5M/0.5M pH 10.7) containing 0.025% (w/v) of Triton X-100. Fluorescence was measured in a SpectraMax M2 microplate reader (Molecular-Devices) using a 365 nm excitation wavelength and a 435 nm emission wavelength.

Percentage of GALNS inhibition was given with respect to the control (without iminosugar). Experiments were performed in triplicate, and the mean  $\pm$  S. D. was calculated.<sup>1</sup>

### **IDS enzymatic test:**

Enzyme activity was measured by setting the reaction in 0.2 ml tubes and performing the experiments in triplicates as follows:

Step 1:

Iminosugars solution (3  $\mu$ l), leukocytes homogenate (7  $\mu$ l) and 20  $\mu$ l of 4-methylumbelliferyl- $\alpha$ -L-Iduronide-2-sulphate·2Na (Moscerdam Substrates) substrate solution were incubated for 4 h at 37 °C.

Step 2:

After step 1 the tubes were placed on an ice cooler and the reaction stopped by addition of 20  $\mu$ l of Na-Phosphate/Citrate buffer (0.2M/ 0.1M pH 4.5) and by efficient mixing with vortex. Then, 10  $\mu$ l of LEBT (Lysosomal Enzymes purified from Bovine Testis) were added to each sample and the incubation was continued for 24 hours at 37°C.

At the end of this period tubes were placed on an ice cooler and the samples were transferred in a cooled flat-bottomed 96 well plate and the reaction was immediately stopped by addition of 200  $\mu$ l of NaHCO<sub>3</sub>/Na<sub>2</sub>CO<sub>3</sub> buffer (0.5M/0.5M pH 10.7) containing 0.025% (w/v) of Triton X-100.

Fluorescence was then measured in a SpectraMax M2 microplate reader (Molecular-Devices) using a 365 nm excitation wavelength and a 435 nm emission wavelength.

Percentage of IDS inhibition was given with respect to the control (without iminosugar). Experiments were performed in triplicate, and the mean  $\pm$  S. D. was calculated.<sup>2</sup>

### **IC<sub>50</sub> determination<sup>3</sup>**

The IC<sub>50</sub> values against the GALNS and IDS inhibitors were determined by measuring the initial hydrolysis rate under fixed 4-methylumbelliferyl- $\beta$ -galactoside-6-sulphate·Na concentration (6.66 mM). and 4-methylumbelliferyl- $\alpha$ -L-Iduronide-2-sulphate·2Na

---

<sup>1</sup>O. P. Van Diggelen, H. Zhao, W. J. Kleijer, H. C. Janse, B. J. H. M. Poorthuis, J. Van Pelt, J. P. Kamerling and H. Galjaard, *Clinica Chimica Acta*, 1990, **187**, 131.

<sup>2</sup>Y. V. Voznyi, J. L. Keulemans and O. P. van Diggelen, *J. Inher. Metabol. Dis.*, **2001**, 24, 675.

<sup>3</sup>R. Ottanà, R. Maccari, J. Mortier, A. Caselli, S. Amuso, G. Camici, A. Rotondo, G. Wolber and P. Paoli, *Eur. J. Med. Chem.*, 2014, **71**, 112.

concentration (0.833 mM) respectively. Data obtained were fitted to the following equation using the Origin Microcal program:

$$\frac{V_i}{V_o} = \frac{Max - Min}{1 + \left(\frac{x}{IC_{50}}\right)^{slope}} + Min$$

where  $V_i/V_o$ , represents the ratio between the activity measured in the presence of the inhibitor ( $V_i$ ) and the activity of the control without the inhibitor ( $V_o$ ), "x" the inhibitor concentration, Max and Min, the maximal and minimal enzymatic activity observed, respectively.

# GALNS

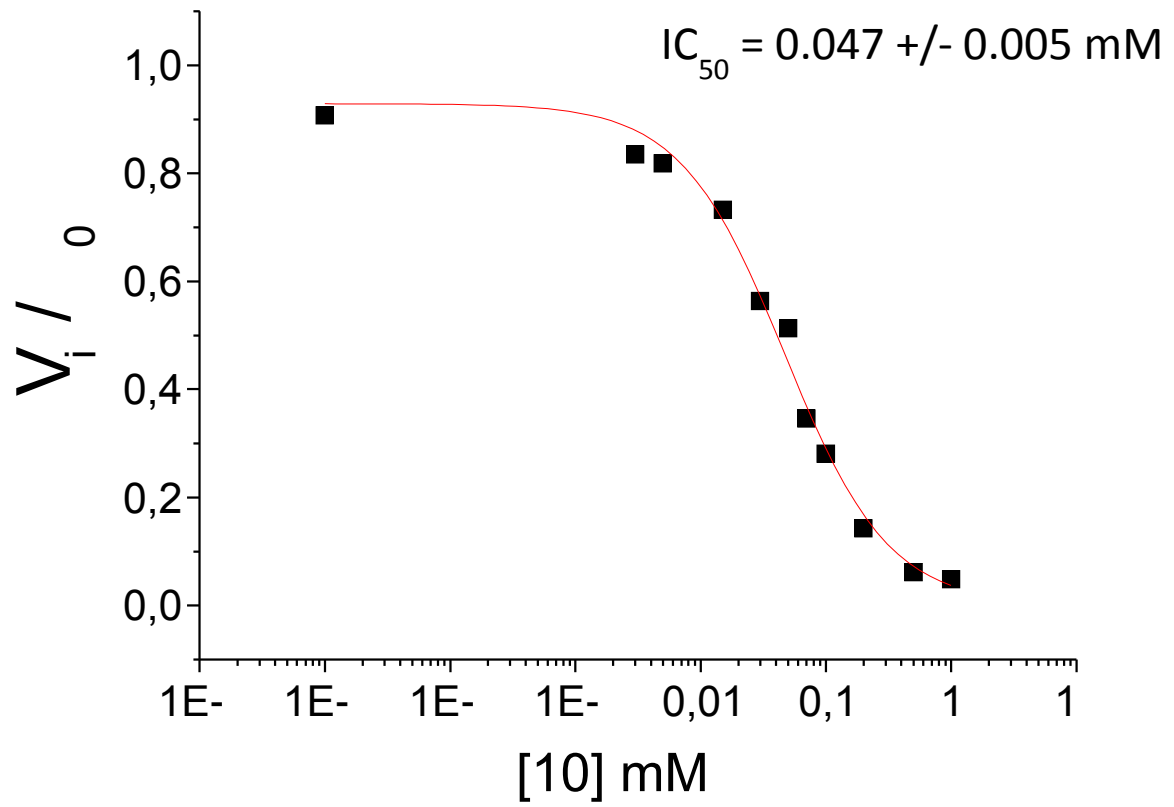

# GALNS

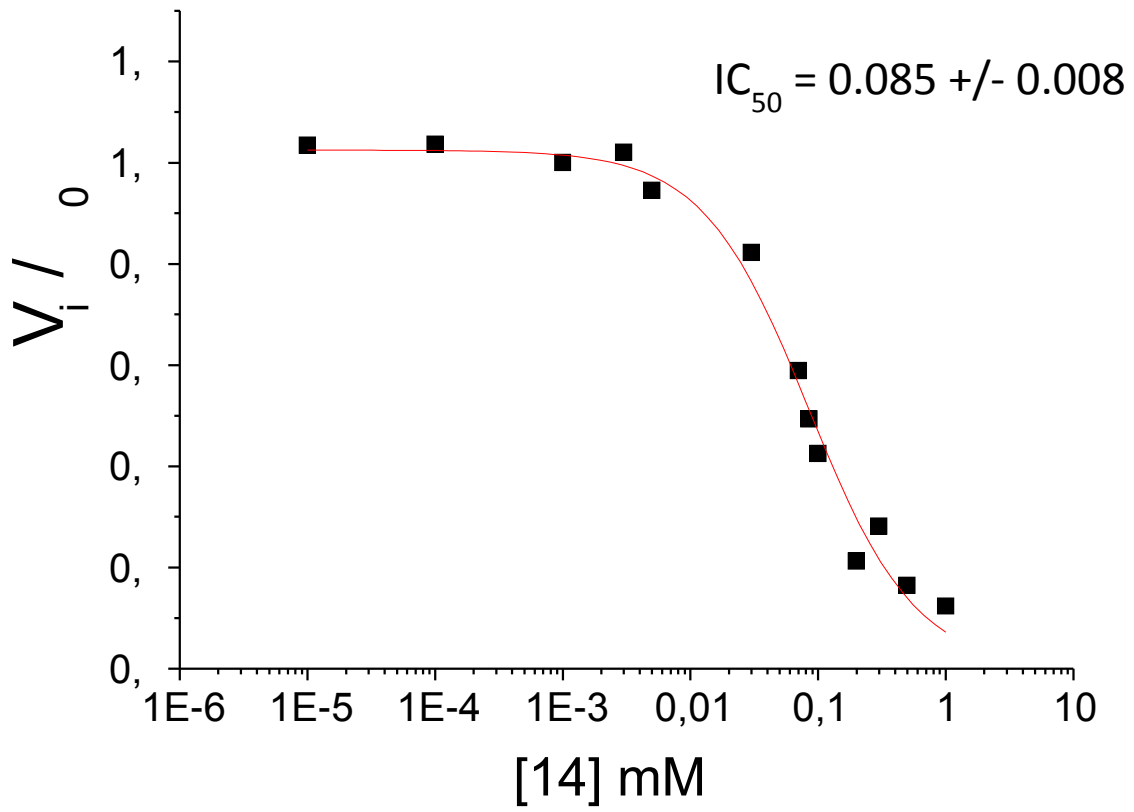



# GALNS

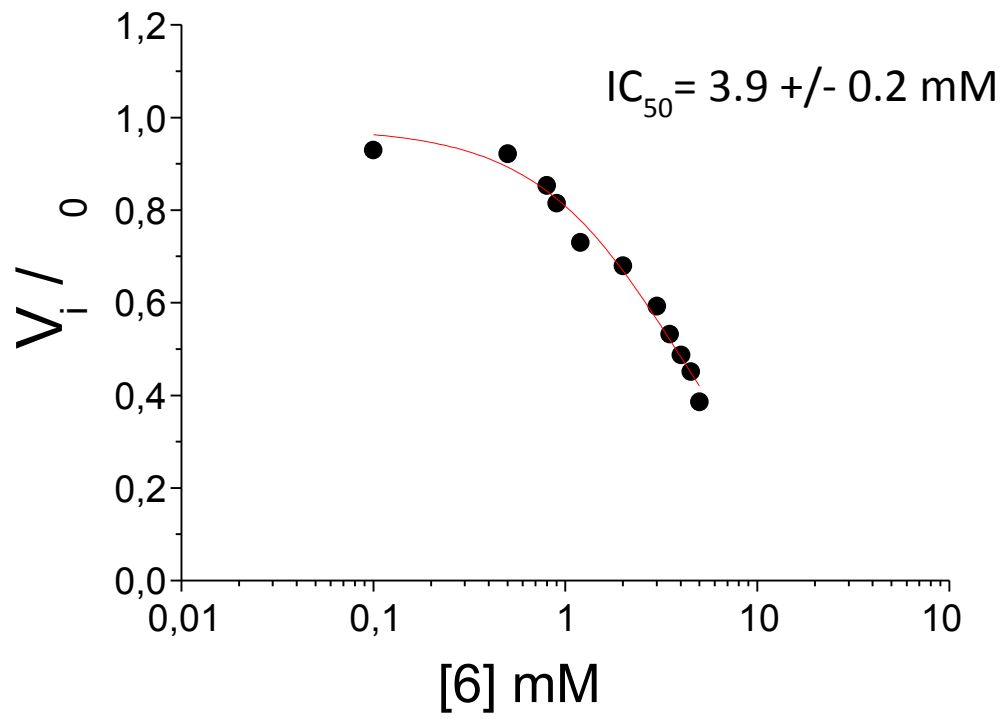

# GALNS

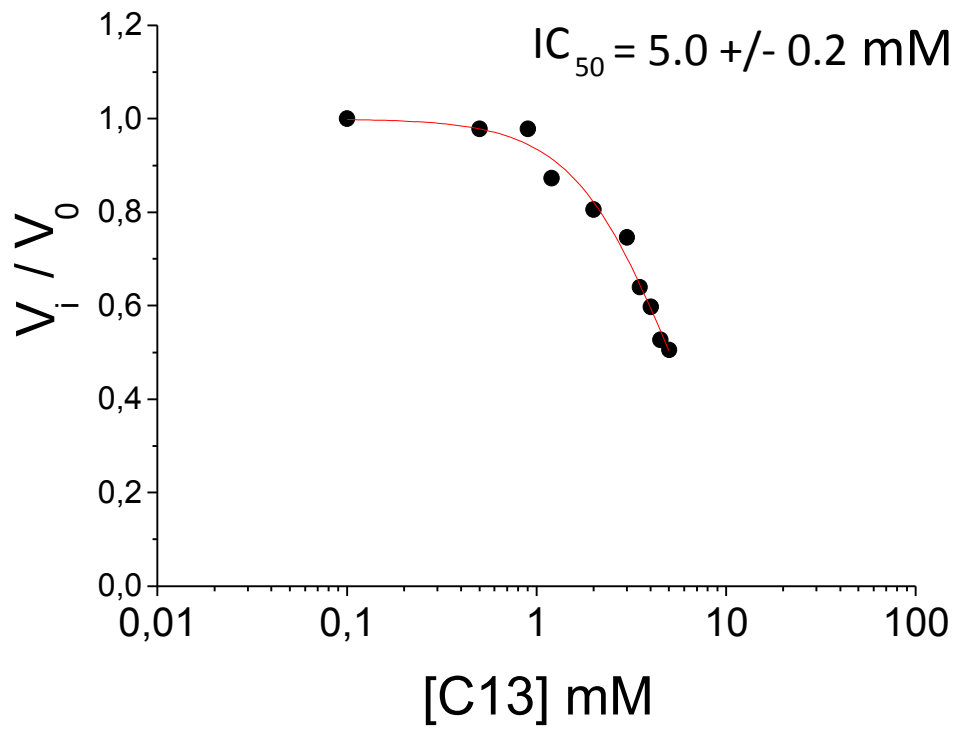

# IDS

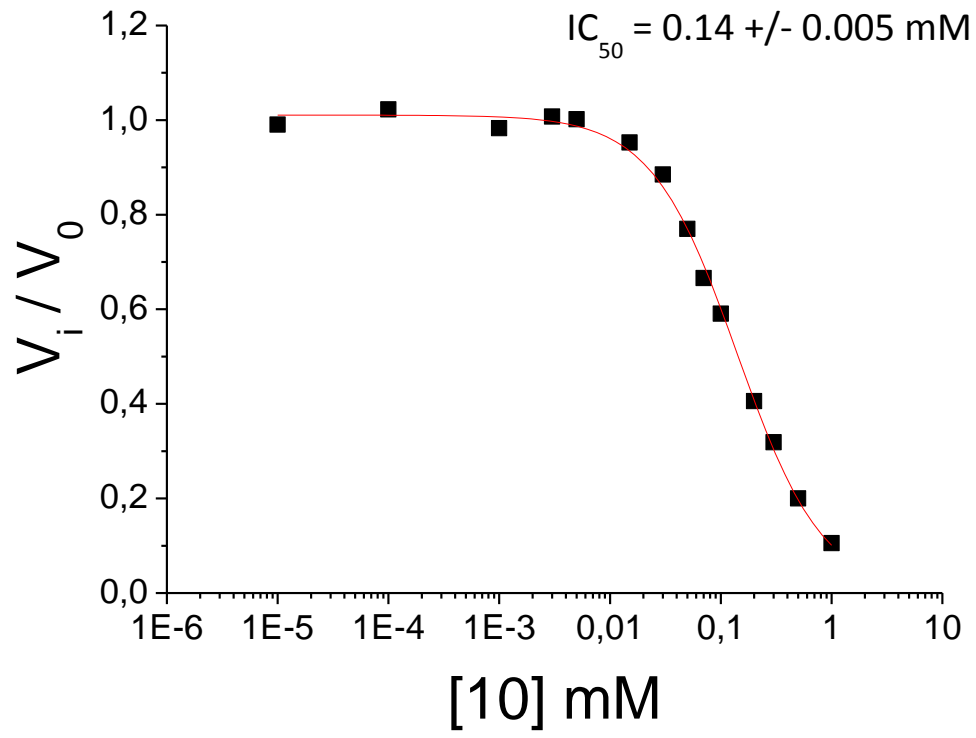

# IDS

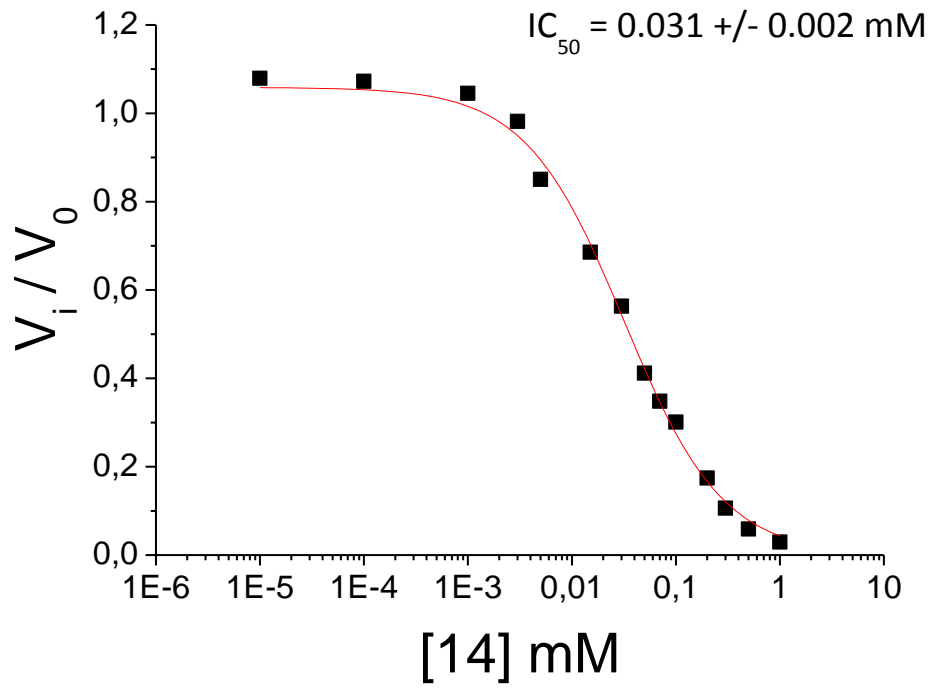

# IDS

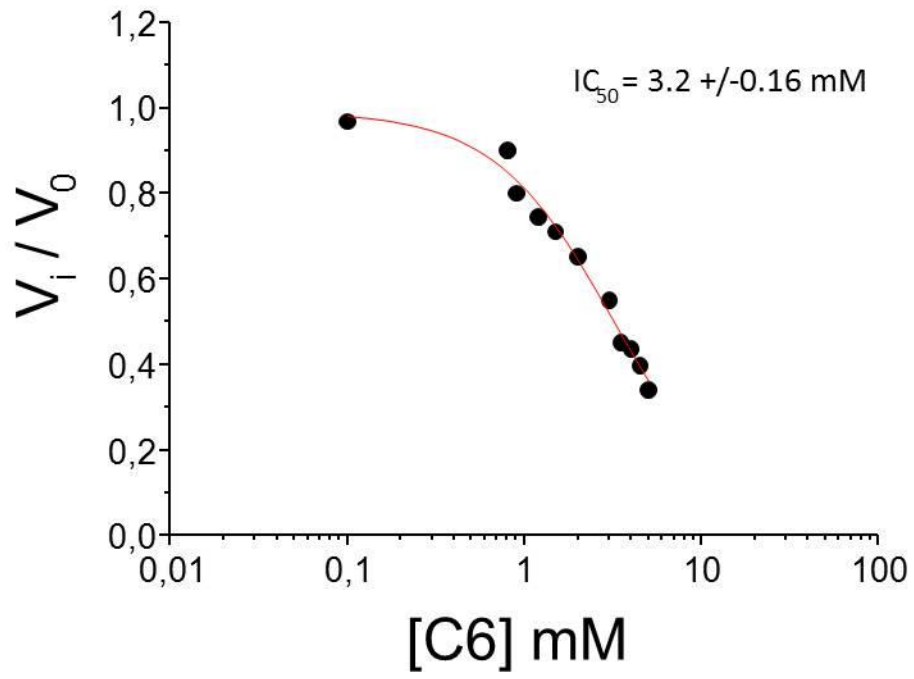

# IDS

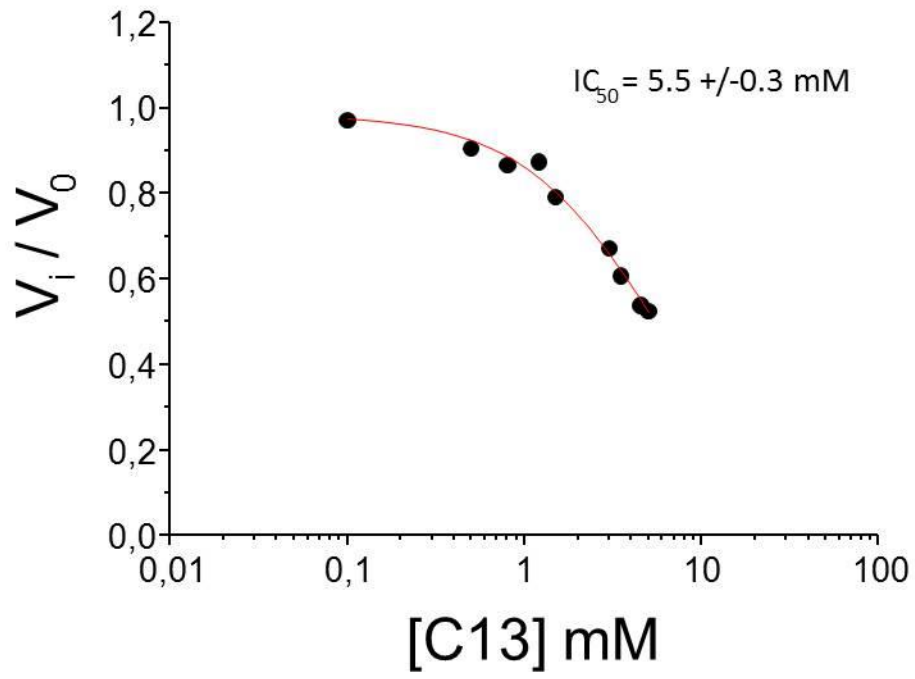

Supplement: c6ra15806d1.pdf [file c6ra15806d1.pdf]
